# Supplementary material for: Transcriptome Analysis of Salt Stress Responsiveness in the Seedlings of Dongxiang Wild Rice (Oryza rufipogon Griff.)
Source: PubMed Central journal article supplement (PMC4709063; doi:10.1371/journal.pone.0146242), 2016-01-11
Supplement: pone.0146242.s009.pdf [file pone.0146242.s009.pdf]

**S6 Table. List of NAC-type genes among the DEGs detected by RNA-Seq.**

| Gene name      | Gene ID        | Up or down (Log <sub>2</sub> ratio) |              |
|----------------|----------------|-------------------------------------|--------------|
|                |                | LS vs. LCK                          | RS vs. RCK   |
| <i>ONAC001</i> | LOC_Os09g33490 | down (-1.12)                        | none         |
| <i>ONAC003</i> | LOC_Os01g09550 | none                                | down (-1.66) |
| <i>ONAC007</i> | LOC_Os06g04090 | none                                | down (-1.35) |
| <i>ONAC008</i> | LOC_Os04g43560 | none                                | down (-1.40) |
| <i>ONAC010</i> | LOC_Os07g37920 | up (1.87)                           | none         |
| <i>ONAC012</i> | LOC_Os05g37080 | none                                | down (-1.34) |
| <i>ONAC015</i> | LOC_Os07g48550 | down (-1.27)                        | none         |
| <i>ONAC017</i> | LOC_Os11g05614 | none                                | up (1.36)    |
| <i>ONAC022</i> | LOC_Os03g04070 | none                                | up (1.68)    |
| <i>ONAC029</i> | LOC_Os08g02300 | down (-1.12)                        | none         |
| <i>ONAC039</i> | LOC_Os03g21030 | up (1.97)                           | none         |
| <i>ONAC048</i> | LOC_Os01g66120 | up (2.28)                           | up (1.21)    |
| <i>ONAC055</i> | LOC_Os03g01870 | down (-1.93)                        | none         |
| <i>ONAC062</i> | LOC_Os05g48850 | down (-1.11)                        | down (-1.98) |
| <i>ONAC066</i> | LOC_Os03g56580 | down (-1.52)                        | up (1.64)    |
| <i>ONAC068</i> | LOC_Os01g60020 | none                                | up (3.35)    |
