# Supplementary material for: Transcriptome Analysis of Salt Stress Responsiveness in the Seedlings of Dongxiang Wild Rice (Oryza rufipogon Griff.)
Source: PubMed Central journal article supplement (PMC4709063; doi:10.1371/journal.pone.0146242), 2016-01-11
Supplement: pone.0146242.s018.pdf [file pone.0146242.s018.pdf]

**S15 Table. Significant GO terms of DEGs in the cellular component category for RS vs. RCK.**

| GO term    | GO term annotation                           | <i>P</i> -value |
|------------|----------------------------------------------|-----------------|
| GO:0005840 | ribosome                                     | 6.37E-258       |
| GO:0030529 | ribonucleoprotein complex                    | 3.79E-226       |
| GO:0009579 | thylakoid                                    | 3.37E-217       |
| GO:0022626 | cytosolic ribosome                           | 8.70E-203       |
| GO:0044445 | cytosolic part                               | 1.80E-192       |
| GO:0043228 | non-membrane-bounded organelle               | 1.49E-191       |
| GO:0043232 | intracellular non-membrane-bounded organelle | 1.49E-191       |
| GO:0044436 | thylakoid part                               | 3.27E-183       |
| GO:0034357 | photosynthetic membrane                      | 1.70E-180       |
| GO:0044391 | ribosomal subunit                            | 3.82E-165       |
| GO:0042651 | thylakoid membrane                           | 7.39E-147       |
| GO:0032991 | macromolecular complex                       | 5.81E-146       |
| GO:0009507 | chloroplast                                  | 1.06E-145       |
| GO:0031984 | organelle subcompartment                     | 3.93E-141       |
| GO:0009534 | chloroplast thylakoid                        | 4.70E-141       |
| GO:0031976 | plastid thylakoid                            | 4.70E-141       |
| GO:0009535 | chloroplast thylakoid membrane               | 1.47E-140       |
| GO:0055035 | plastid thylakoid membrane                   | 3.30E-140       |
| GO:0044446 | intracellular organelle part                 | 1.09E-135       |
| GO:0044422 | organelle part                               | 2.32E-135       |
| GO:0009521 | photosystem                                  | 8.13E-106       |
| GO:0044435 | plastid part                                 | 9.41E-102       |
| GO:0044434 | chloroplast part                             | 2.17E-101       |
| GO:0005829 | cytosol                                      | 9.61E-96        |
| GO:0005730 | nucleolus                                    | 2.09E-94        |
| GO:0022625 | cytosolic large ribosomal subunit            | 5.01E-88        |
| GO:0015934 | large ribosomal subunit                      | 1.18E-86        |
| GO:0044444 | cytoplasmic part                             | 6.34E-80        |
| GO:0005737 | cytoplasm                                    | 8.05E-77        |
| GO:0010287 | plastoglobule                                | 2.50E-75        |
| GO:0015935 | small ribosomal subunit                      | 1.95E-74        |
| GO:0009526 | plastid envelope                             | 1.32E-71        |
| GO:0009941 | chloroplast envelope                         | 5.28E-71        |
| GO:0009522 | photosystem I                                | 3.01E-67        |
| GO:0009532 | plastid stroma                               | 3.39E-67        |
| GO:0009570 | chloroplast stroma                           | 3.43E-65        |
| GO:0009536 | plastid                                      | 1.84E-62        |
| GO:0022627 | cytosolic small ribosomal subunit            | 2.73E-60        |
| GO:0005618 | cell wall                                    | 3.59E-56        |
| GO:0048046 | apoplast                                     | 6.66E-55        |
| GO:0030312 | external encapsulating structure             | 1.55E-52        |
| GO:0005576 | extracellular region                         | 1.09E-51        |

|            |                                                                             |            |
|------------|-----------------------------------------------------------------------------|------------|
| GO:0031967 | organelle envelope                                                          | 3.61E-51   |
| GO:0031981 | nuclear lumen                                                               | 4.83E-51   |
| GO:0009523 | photosystem II                                                              | 2.17E-50   |
| GO:0070013 | intracellular organelle lumen                                               | 3.01E-50   |
| GO:0043233 | organelle lumen                                                             | 3.38E-50   |
| GO:0031974 | membrane-enclosed lumen                                                     | 3.78E-49   |
| GO:0031975 | envelope                                                                    | 1.94E-48   |
| GO:0044428 | nuclear part                                                                | 1.45E-40   |
| GO:0016020 | membrane                                                                    | 9.91E-38   |
| GO:0009538 | photosystem I reaction center                                               | 2.21E-29   |
| GO:0043229 | intracellular organelle                                                     | 6.4E-28    |
| GO:0043226 | organelle                                                                   | 7.29E-28   |
| GO:0010319 | stromule                                                                    | 1.48E-27   |
| GO:0031977 | thylakoid lumen                                                             | 7.66E-27   |
| GO:0005773 | vacuole                                                                     | 8.34E-23   |
| GO:0044424 | intracellular part                                                          | 2.08E-21   |
| GO:0009654 | oxygen evolving complex                                                     | 6.7E-21    |
| GO:0009503 | thylakoid light-harvesting complex                                          | 1.6E-18    |
| GO:0030076 | light-harvesting complex                                                    | 4.1E-18    |
| GO:0071944 | cell periphery                                                              | 6.09E-17   |
| GO:0005622 | intracellular                                                               | 8.57E-16   |
| GO:0009783 | photosystem II antenna complex                                              | 7.04E-15   |
| GO:0045261 | proton-transporting ATP synthase complex, catalytic core F(1)               | 1.11E-13   |
| GO:0033178 | proton-transporting two-sector ATPase complex, catalytic domain             | 1.8E-13    |
| GO:0031982 | vesicle                                                                     | 2.35E-13   |
| GO:0031988 | membrane-bounded vesicle                                                    | 2.98E-13   |
| GO:0045259 | proton-transporting ATP synthase complex                                    | 5.64E-13   |
| GO:0016023 | cytoplasmic membrane-bounded vesicle                                        | 7.56E-13   |
| GO:0031410 | cytoplasmic vesicle                                                         | 7.8E-13    |
| GO:0009543 | chloroplast thylakoid lumen                                                 | 9.69E-13   |
| GO:0031978 | plastid thylakoid lumen                                                     | 9.69E-13   |
| GO:0009517 | PSII associated light-harvesting complex II                                 | 2.18E-11   |
| GO:0016469 | proton-transporting two-sector ATPase complex                               | 5.06E-11   |
| GO:0009533 | chloroplast stromal thylakoid                                               | 6.75E-11   |
| GO:0005623 | cell                                                                        | 2.3E-08    |
| GO:0044464 | cell part                                                                   | 2.3E-08    |
| GO:0005886 | plasma membrane                                                             | 2.87E-08   |
| GO:0000275 | mitochondrial proton-transporting ATP synthase complex, catalytic core F(1) | 0.00000405 |
| GO:0030686 | 90S preribosome                                                             | 0.0000113  |
| GO:0005754 | mitochondrial proton-transporting ATP synthase, catalytic core              | 0.0000165  |
| GO:0045267 | proton-transporting ATP synthase, catalytic core                            | 0.0000165  |
| GO:0009512 | cytochrome b6f complex                                                      | 0.0000458  |
| GO:0005753 | mitochondrial proton-transporting ATP synthase complex                      | 0.0000954  |
| GO:0030684 | preribosome                                                                 | 0.00103    |

|            |                                                      |         |
|------------|------------------------------------------------------|---------|
| GO:0009573 | chloroplast ribulose biphosphate carboxylase complex | 0.0011  |
| GO:0048492 | ribulose biphosphate carboxylase complex             | 0.0011  |
| GO:0043231 | intracellular membrane-bounded organelle             | 0.00126 |
| GO:0031012 | extracellular matrix                                 | 0.00129 |
| GO:0043227 | membrane-bounded organelle                           | 0.00133 |
| GO:0009782 | photosystem I antenna complex                        | 0.00237 |
| GO:0005856 | cytoskeleton                                         | 0.0024  |
| GO:0030054 | cell junction                                        | 0.00369 |
| GO:0005911 | cell-cell junction                                   | 0.00458 |
| GO:0009506 | plasmodesma                                          | 0.00458 |
| GO:0055044 | symplast                                             | 0.00458 |
| GO:0044437 | vacuolar part                                        | 0.02749 |
| GO:0030095 | chloroplast photosystem II                           | 0.02822 |
| GO:0032040 | small-subunit processome                             | 0.03088 |
| GO:0005884 | actin filament                                       | 0.03291 |

---
